# Supplementary material for: Mechanistic insights into the structure-based design of a CspZ-targeting Lyme disease vaccine
Source: Springer Nature journal article supplement (doi:10.1038/s41467-025-58182-x), 2025-04-06
Supplement: MOESM1 [file 41467_2025_58182_MOESM1_ESM.pdf]

## Supplementary Information

### Supplementary figures and figure legends

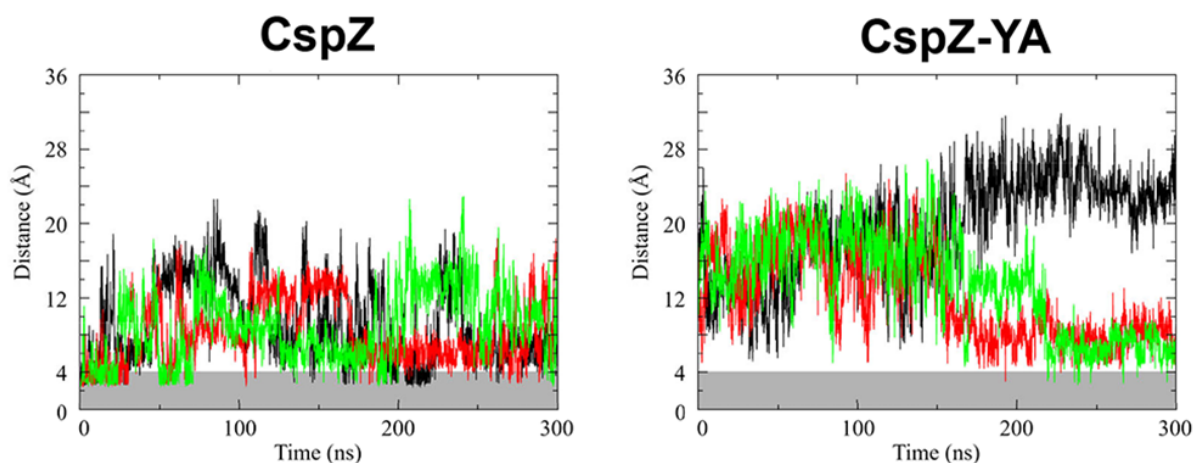

**Figure S1. MD simulations of CspZ and CspZ-YA suggest the salt bridge between E186 and R206 is unlikely to be formed in CspZ-YA.** MD simulations of (A) CspZ and (B) CspZ-YA, showed the distance between the side chains of residues E186 and R206 over 300 ns. Proximity below 4 Å, corresponding to salt bridge is shaded in grey. Different colors (black, green, red) represent three independent runs.

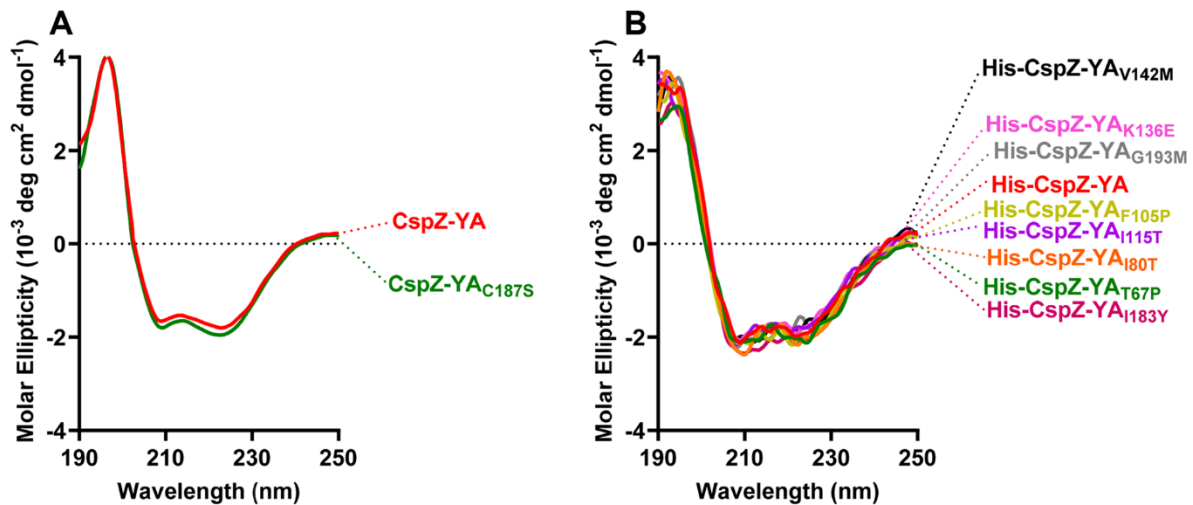

**Figure S2. CD spectra demonstrate no impacts of secondary structures by mutating indicating amino acids of CspZ-YA.** Far-UV CD analysis of (A) untagged CspZ-YA and CspZ-YA<sub>C187S</sub> (CspZ-YA<sub>C187S</sub>), and (B) histidine tagged CspZ-YA (His-CspZ-YA) and the mutant proteins derived from this protein. The molar ellipticity,  $\Phi$ , was measured from 190-250nm for 10 $\mu$ M of each protein in PBS. Source data are provided as a Source Data file.

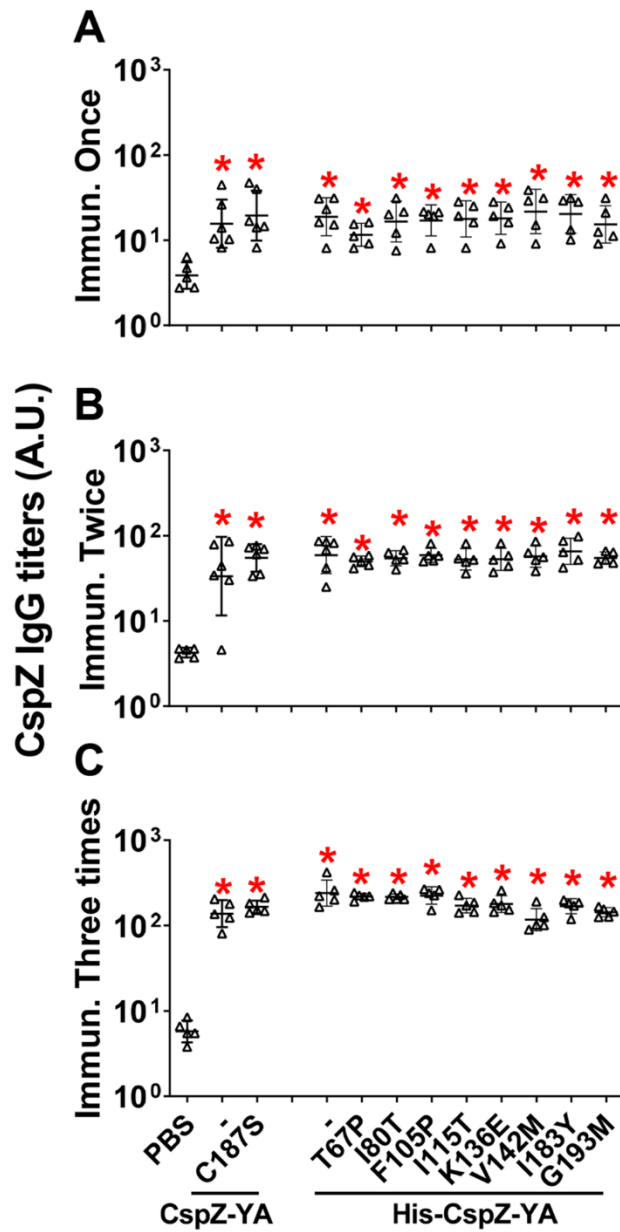

**Figure S3. Immunization of CspZ-YA and its mutant proteins triggered indistinguishable levels of antibodies against CspZ.** Sera were collected at 14dpli from pre-adolescent C3H/HeN mice immunized (A) once, (B) twice, or (C) three times in the fashion as described in Fig. 1. These mice were immunized with PBS (control) or untagged CspZ-YA or its derived mutant protein, or histidine tagged CspZ-YA (His-CspZ-YA), or its derived mutant proteins (Six mice for CspZ-YA- or CspZ-YA<sub>C187S</sub>-immunized mice whereas five mice for the rest of immunization groups of mice).

The levels of total IgG against CspZ were determined using quantitative ELISA. Data shown are the geometric mean  $\pm$  geometric standard deviation of the titers of anti-CspZ antibodies from n = 6 mice immunized once or twice or n = 5 mice immunized three times with CspZ-YA, CspZ-YA<sub>C187S</sub> or His-CspZ-YA or n = 5 mice inoculated with each of other proteins or PBS. Asterisks indicate the statistical significances ( $p < 0.05$ , Kruskal Wallis test with the two-stage step-up method of Benjamini, Krieger, and Yekutieli) of differences in antibody titers relative to the sera from PBS-inoculated mice. **(A)** PBS: CspZ-YA, C187S, His-CspZ-YA, T67P, I80T, F105P, I115T, K136E, V142M, I183Y, G193M  $p = 0.013, 0.002, 0.0017, 0.0129, 0.0092, 0.0071, 0.0049, 0.0044, 0.0007, 0.0014, 0.0143$ . **(B)** PBS: CspZ-YA, C187S, His-CspZ-YA, T67P, I80T, F105P, I115T, K136E, V142M, I183Y, G193M  $p = 0.0466, 0.0036, 0.0006, 0.0361, 0.0085, 0.0036, 0.0169, 0.0154, 0.0045, 0.0004, 0.0009$ . **(C)** PBS: CspZ-YA, C187S, His-CspZ-YA, T67P, I80T, F105P, I115T, K136E, V142M, I183Y, G193M  $p = 0.0361, 0.0272, < 0.0001, < 0.0001, < 0.0001, < 0.0001, 0.0134, 0.0076, 0.0429, 0.0177, 0.0411$ . Source data are provided as a Source Data file.

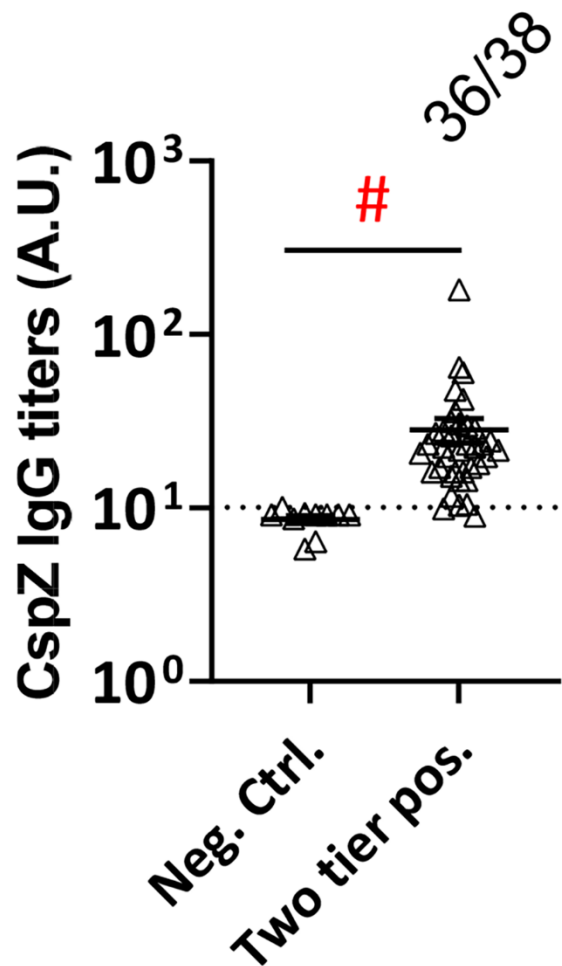

65

66 **Figure S4. More than 90% of Lyme disease human patients develop CspZ antibodies.** Sera  
 67 from patients with seropositive for Lyme disease infection (Two tier pos.; Positive in Two tier test)  
 68 were determined for the titers of antibodies that recognize untagged CspZ using ELISA, as  
 69 described in the section “ELISA” of the Materials and Methods. The serum samples from humans  
 70 residing in non-endemic area of Lyme disease were included as negative control (Neg. ctrl.) and  
 71 to set up the threshold value of titers that can be used to determine CspZ antibody positivity. That  
 72 threshold value was mean 1.5-folds of standard deviation extrapolated from the values of negative  
 73 control human sera. Thirty six out of 38 serum samples (94.7%) yield greater anti-CspZ IgG titers

than the threshold values and was thus considered positive for CspZ antibodies. Shown is the geometric mean  $\pm$  geometric standard deviation of the titers from sera of 38 patients or 10 negative control humans. Statistical significance ( $p < 0.05$ , Mann-Whitney test) of differences in CspZ-IgG titers between groups are indicated (“#”). Neg. Ctrl.: Two tier pos.  $p < 0.0001$  Source data are provided as a Source Data file.

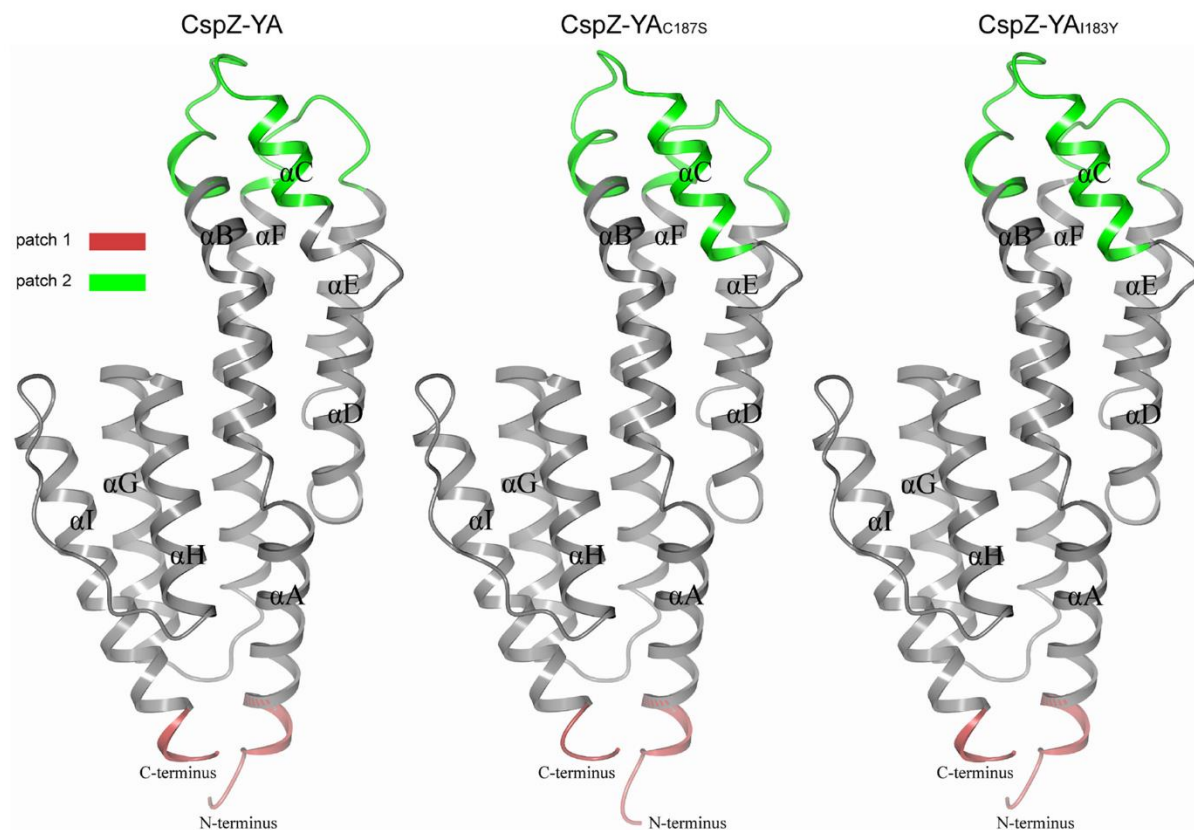

**Figure S5. The epitopes of CspZ-YA, CspZ-YA<sub>C187S</sub>, and CspZ-YA<sub>I183Y</sub> were predicted based on MLCE.** The crystal structures of CspZ-YA (PDB ID 9F1V), CspZ-YA<sub>C187S</sub> (PDB ID 9F21) and the predicted structure of CspZ-YA<sub>I183Y</sub> were mapped for the putative immunogenic epitope patches as predicted by the matrix of lowest coupling energies (MLCE). All nine  $\alpha$ -helices of CspZ variants are labeled ( $\alpha$ A- $\alpha$ I).

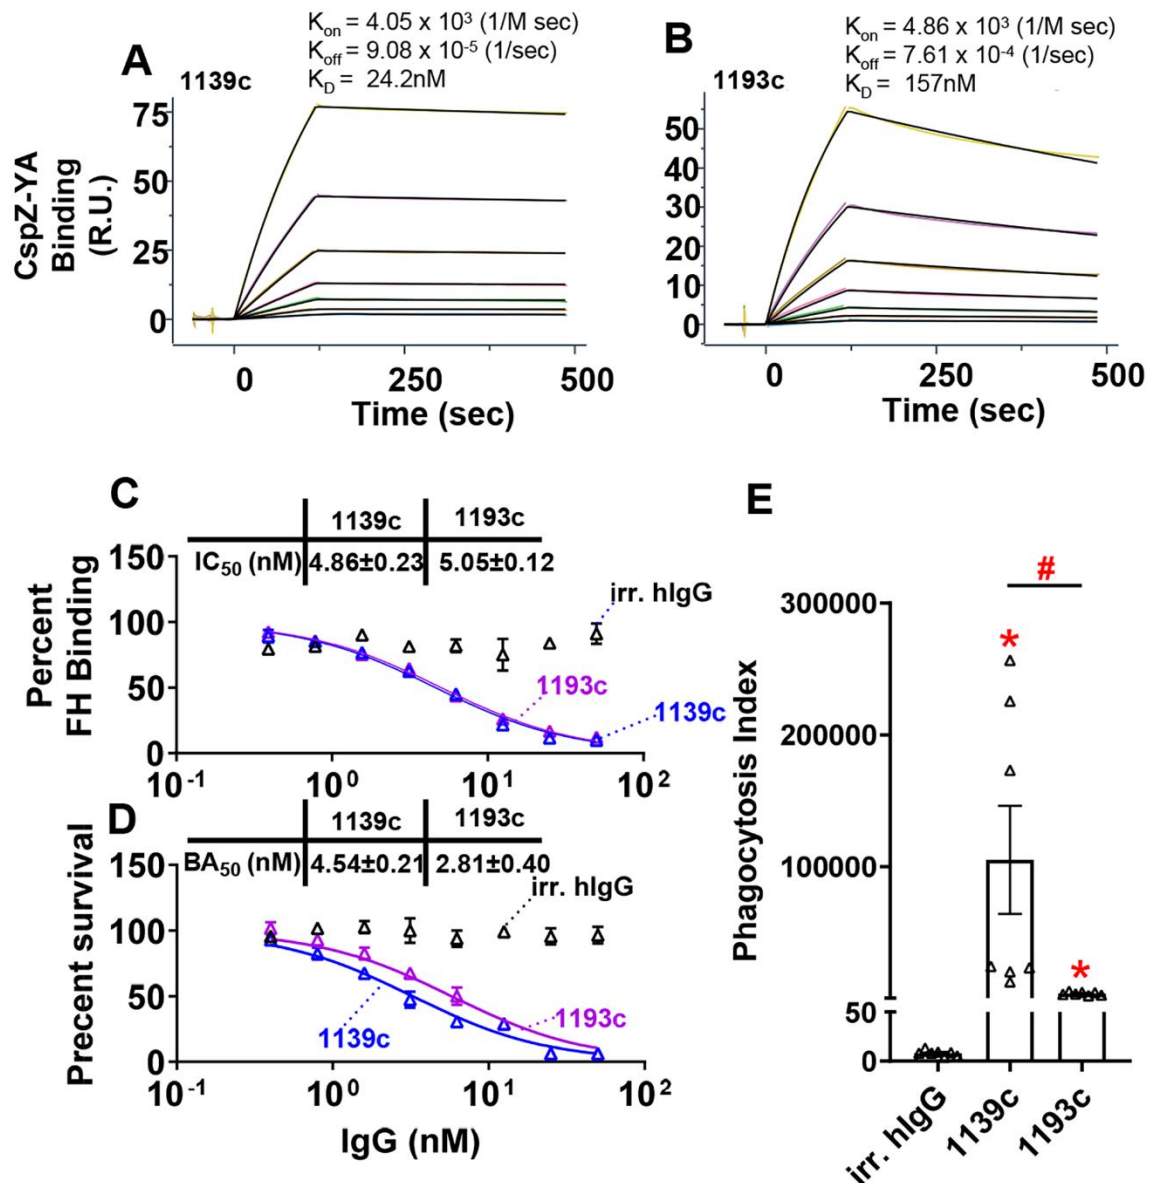

108

109 **Figure S6. The humanized chimeric monoclonal antibodies 1139c and 1193c efficiently**

110 **recognize CspZ-YA, prevent human FH-binding, and promote lysis and opsonophagocytosis**

111 **of *B. burgdorferi*. (A and B) The humanized chimeric monoclonal antibody (A) #1139c or (B)**

112 **#1193c was flowed over the chip surface, conjugated with indicated untagged CspZ-YA. Binding**

113 **was measured in response units (R.U.) by surface plasmon resonance. Shown is the mean  $\pm$**

114 **standard deviation of the  $k_{on}$ ,  $k_{off}$ , and  $K_D$  values extrapolated from  $n = 3$  experiments. One**



115 represented experiment is shown in this panel. **(C)** The monoclonal antibody #1139c or #1193c,  
116 or irrelevant human IgG (control, irr. hIgG) at indicated concentrations or PBS (control, data not  
117 shown) was added into the CspZ-coated ELISA plate wells. Each of those wells was then incubated  
118 with human FH, and the levels of bound FH were quantified using sheep anti-human FH and goat  
119 anti-sheep HRP IgG as primary and secondary antibodies, respectively. The work was performed  
120 on  $n = 3$  independent experiments; within each experiment, samples were run in triplicate. Data  
121 are expressed as the percent human FH binding, derived by normalizing the levels of bound human  
122 FH from IgG-treated wells to that from PBS-treated wells. Data shown are the mean  $\pm$  SEM of the  
123 percent human FH binding from  $n = 3$  replicates. Shown is one representative experiment. The  
124 concentrations of the IgG to inhibit 50% of human FH bound by CspZ ( $IC_{50}$ ) was obtained from  
125 curve-fitting and shown in the inset figure. The  $IC_{50}$  values are shown as the mean  $\pm$  SD of from  
126 three experiments. **(D)** The monoclonal antibody #1139c or #1193c, or irrelevant human IgG  
127 (control, irr. hIgG) or PBS (control, data not shown) were serially diluted as indicated, and mixed  
128 with guinea pig complement and *B. burgdorferi* strains B31-A3 ( $5 \times 10^5$  cells  $ml^{-1}$ ). After  
129 incubated for 24 hours, surviving spirochetes were quantified from three fields of view for each  
130 sample using dark-field microscopy. The work was performed on three independent experiments.  
131 The survival percentage was derived from the proportion of IgG-treated to PBS-treated spirochetes.  
132 Shown is one representative experiment, and in that experiment, the data points are the mean  $\pm$   
133 SEM of the survival percentage from three replicates. The 50% borreliacidal activity of each IgGs  
134 ( $BA_{50}$ ), representing the IgG concentrations that effectively killed 50% of spirochetes, was  
135 obtained and extrapolated from curve-fitting and shown in the inset figure. The  $BA_{50}$  values are  
136 shown as the mean  $\pm$  SD of from  $n = 3$  experiments. **(E)** Human sera in the presence of irrelevant  
137 human IgG (control), 1139c, or 1193c ( $2\mu M$ ) were incubated with PMNs ( $5 \times 10^6$  cells  $ml^{-1}$ ) and

indicated CFSE-labeled *B. burgdorferi* B31-A3 ( $5 \times 10^7$  cells ml<sup>-1</sup>). The resulting *B. burgdorferi*-PMN mixtures were applied to flow cytometry after 10 min of incubation at 37°C to obtain the mean fluorescence intensity (MFI) values. The MFI values derived from *B. burgdorferi*-PMN mixtures incubated at 4°C throughout the experiment are included as control. The MFI values of each of the *B. burgdorferi*-PMN mixtures in 37°C and 4°C were used to calculate “Phagocytic index” as described in “Materials and Methods” to quantitatively show the levels of phagocytosis. This assay was performed in four independent determinations, and shown is one representative experiment. The panel represents the mean of phagocytic index  $\pm$  SEM from n = 7 independent determinations. Asterisks indicate the statistical significance ( $p < 0.05$ , Kruskal Wallis test with the two-stage step-up method of Benjamini, Krieger, and Yekutieli) of differences in phagocytic index relative to irrelevant human IgG-treated Lyme borreliæ. (E) irr. hIgG: 1139c, 1193c  $p = < 0.0001, 0.0348$ . 1139c: 1193c  $p = 0.0348$ . Source data are provided as a Source Data file.

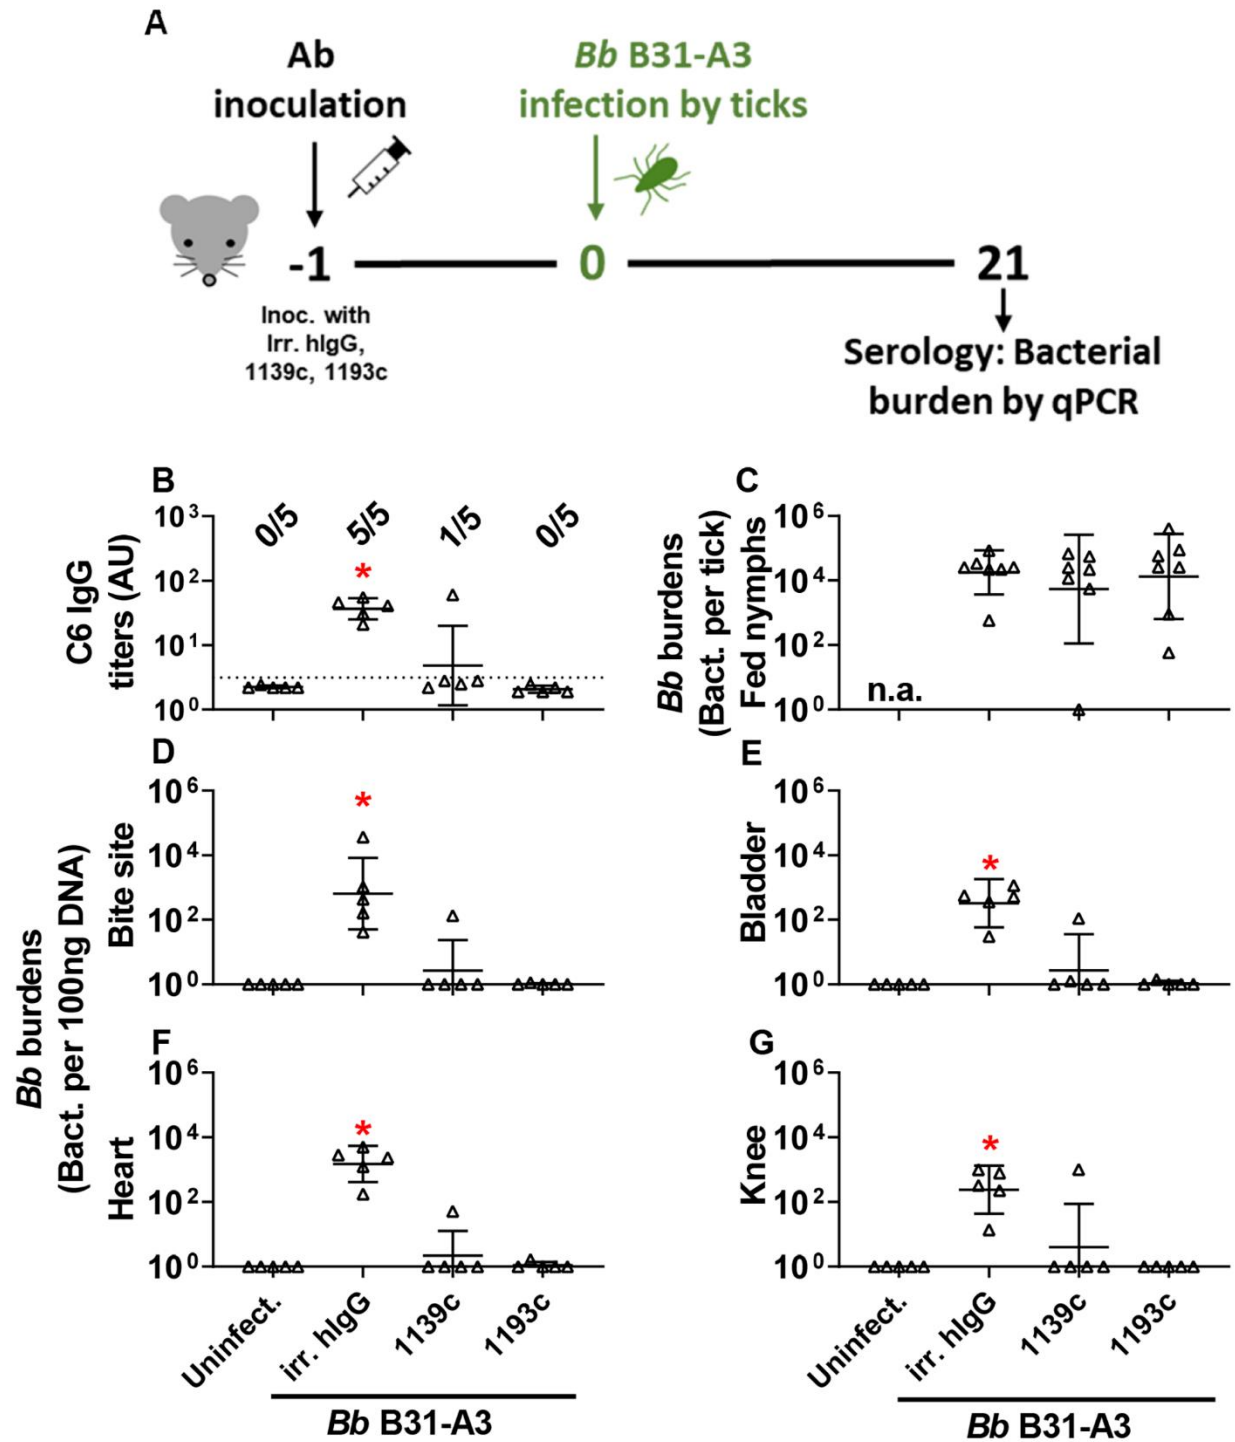

161

162 **Figure S7. The humanized chimeric monoclonal antibodies 1139c and 1193c prevent**

163 **seroconversion and tissue colonization caused by *B. burgdorferi* B31-A3 infection. (A)**

164 **Timeframe of the IgG inoculation and *B. burgdorferi* infection. (B to G) Pre-adolescent C3H/HeN**

mice were inoculated with the monoclonal antibody #1139c or #1193c, or irrelevant human IgG (control, irr. hIgG) at the dose of 1 mg/kg. At 24 hours after IgG inoculation, these mice were fed on by *I. scapularis* nymphs carrying *B. burgdorferi* B31-A3 (*Bb* B31-A3). An additional mice inoculated with PBS but not fed on by ticks were included as the control (Uninfect.). The tissues were collected from those mice at 4 days post nymph feeding. Spirochete burdens at **(B)** the tick feeding site (“Bite Site”), **(C)** bladder, **(D)** heart, and **(E)** knees were quantitatively measured at 21 dpf, shown as the number of spirochetes per 100ng total DNA. Data shown are the geometric mean  $\pm$  geometric standard deviation of the spirochete burdens from n = 7 nymphs per group or n = 5 mice per group. Statistical significances ( $p < 0.05$ , Kruskal-Wallis test with the two-stage step-up method of Benjamini, Krieger, and Yekutieli) of differences in bacterial burdens relative to (\*) uninfected mice are presented. **(B)** Uninfect.: irr. hIgG  $p = 0.0078$ . **(D)** Uninfect.: irr. hIgG  $p = 0.0007$ . **(E)** Uninfect.: irr. hIgG  $p = 0.0007$ . **(F)** Uninfect.: irr. hIgG  $p = 0.0006$ . **(G)** Uninfect.: irr. hIgG  $p = 0.0017$ . Source data are provided as a Source Data file.

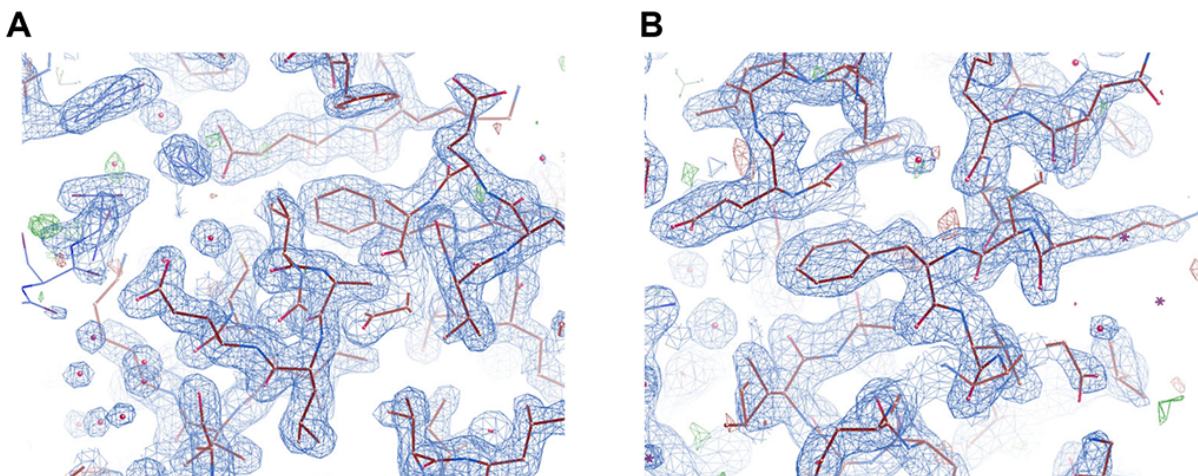

**Figure S8. The electron density maps of the portions of the crystal structures of CspZ-YA and CspZ-YA<sub>C187S</sub>.** The electron density maps of newly resolved crystal structures of CspZ-YA proteins in this study. Shown are the portions of the crystal structures of (A) CspZ-YA and (B) CspZ-YA<sub>C187S</sub>.

193 **Supplementary Tables**194 **Table S1. Data processing, refinement, and validation statistics for the crystal structures.**

| Dataset                                 | CspZ-YA                                       | CspZ-YA <sub>C187S</sub>                      |
|-----------------------------------------|-----------------------------------------------|-----------------------------------------------|
| <b>X-ray diffraction data</b>           |                                               |                                               |
| PDB entry                               | 9F1V                                          | 9F21                                          |
| Beamline                                | Diamond Light Source<br>beamline I03          | BESSY II<br>beamline 14.1                     |
| Space group                             | P2 <sub>1</sub> 2 <sub>1</sub> 2 <sub>1</sub> | P2 <sub>1</sub> 2 <sub>1</sub> 2 <sub>1</sub> |
| <i>a</i> , <i>b</i> , <i>c</i> (Å)      | 31.47, 41.55, 162.56                          | 31.55, 41.68, 162.81                          |
| Matthews coefficient                    | 2.32                                          | 2.15                                          |
| Solvent content in the crystal (%)      | 47.0                                          | 42.8                                          |
| Wavelength (Å)                          | 0.9762                                        | 0.9184                                        |
| Resolution (Å)                          | 162.56-1.90                                   | 41.68-1.95                                    |
| Highest resolution bin (Å)              | 1.94-1.90                                     | 2.00-1.95                                     |
| No. of reflections                      | 231969 (15040)                                | 205571 (15186)                                |
| No. of unique reflections               | 17550 (1116)                                  | 16483 (1144)                                  |
| Completeness (%)                        | 99.5 (100.0)                                  | 99.9 (100.0)                                  |
| R <sub>merge</sub> <sup>a</sup>         | 0.09 (0.46)                                   | 0.09 (0.69)                                   |
| CC <sub>1/2</sub> <sup>b</sup>          | 0.998 (0.972)                                 | 0.998 (0.971)                                 |
| <i>I</i> /σ( <i>I</i> )                 | 15.5 (4.8)                                    | 18.1 (3.6)                                    |
| Multiplicity                            | 13.2 (13.5)                                   | 12.5 (13.3)                                   |
| <b>Refinement</b>                       |                                               |                                               |
| R <sub>work</sub>                       | 0.187 (0.245)                                 | 0.230 (0.318)                                 |
| R <sub>free</sub> <sup>Δ c</sup>        | 0.241 (0.316)                                 | 0.255 (0.376)                                 |
| <b>Average B-factor (Å<sup>2</sup>)</b> |                                               |                                               |

|                                      |       |       |
|--------------------------------------|-------|-------|
| Overall                              | 28.0  | 30.0  |
| From Wilson plot                     | 17.0  | 17.5  |
| No. of atoms                         |       |       |
| Protein                              | 1743  | 1743  |
| Water                                | 198   | 179   |
| <b>RMS deviations from ideal</b>     |       |       |
| Bond lengths (Å)                     | 0.009 | 0.009 |
| Bond angles (°)                      | 1.509 | 1.580 |
| <b>Ramachandran outliers (%)</b>     |       |       |
| Residues in most favored regions (%) | 97.67 | 95.35 |
| Residues in allowed regions (%)      | 2.33  | 4.65  |
| Outliers (%)                         | 0     | 0     |

<sup>a</sup> $R_{\text{merge}} = \sum_{hkl} \sum_i |I_i(hkl) - \langle I(hkl) \rangle| / \sum_{hkl} \sum_i |I_i(hkl)|$  where  $|I_i(hkl)|$  is the observed intensity and  $\langle I(hkl) \rangle$  is the mean intensity <sup>1</sup>.

<sup>b</sup> $CC_{1/2} = \sum_{hkl} [(I_A - \langle I_A \rangle)(I_B - \langle I_B \rangle)] / \sum_{hkl} (I_A - \langle I_A \rangle)^2 \sum_{hkl} (I_B - \langle I_B \rangle)^2$  where  $I_A$  and  $I_B$  are the mean intensities of the two half-datasets for reflection  $hkl$ , and  $\langle I_A \rangle$  and  $\langle I_B \rangle$  are the average intensities for each half-dataset <sup>2</sup>.

<sup>c</sup>For the calculation of  $R_{\text{free}}$ , 5% of the reflections were randomly selected and excluded from the refinement process. Values in parentheses are for the highest resolution bin.  $\Delta R_{\text{free}} = \sum_{\text{test set}} |F_{\text{obs}}(hkl) - F_{\text{calc}}(hkl)| / \sum_{\text{test set}} F_{\text{obs}}(hkl)$  where  $F_{\text{obs}}$  are the observed structure factor amplitudes, and  $F_{\text{calc}}$  are the calculated amplitudes from the model <sup>3</sup>.

**Table S2. BA<sub>50</sub> values of the sera derived from mice immunized with CspZ-YA proteins in different immunization frequency**

| BA <sub>50</sub> <sup>a</sup> | CspZ-YA <sup>b</sup> |         |        |        |         | His-CspZ-YA <sup>c</sup> |         |         |         |         |          |         |
|-------------------------------|----------------------|---------|--------|--------|---------|--------------------------|---------|---------|---------|---------|----------|---------|
|                               | -                    | C187S   | -      | T67P   | I80T    | F105P                    | I115T   | K136E   | V142M   | I183Y   | G193M    |         |
| Immunization frequency        | 1 <sup>d</sup>       | 25±1.6  | 19±1.2 | 26±1.1 | 20±1.5  | 24±1.6                   | 29±1.0  | 25±1.2  | 17±1.2  | 21±1.3  | 29±1.3   | 27±1.1  |
|                               | 2 <sup>d</sup>       | 43±1.3  | 204±1  | 43±1.5 | 45±1.1  | 56±1.1                   | 53±1.0  | 53±1.3  | 41±1.1  | 35±1.3  | 164±1.0  | 48±1.0  |
|                               | 3 <sup>d</sup>       | 232±1.3 | 832±1  | 259±1  | 241±1.2 | 202±1.3                  | 268±1.6 | 287±1.3 | 223±1.4 | 239±1.4 | 1306±1.4 | 238±1.5 |

<sup>a</sup>The dilution rate of the sera that kill 50% of *B. burgdorferi* B31-A3. Shown is the mean ± standard deviation of the BA<sub>50</sub> values derived from three experiments (three replicates per experiment).

<sup>b</sup>Sera from the mice immunized with Untagged CspZ-YA

<sup>c</sup>Sera from the mice immunized with histidine-tagged CspZ-YA

<sup>d</sup>1, 2, and 3 indicate the mice immunized with indicated antigen once, twice, and three times, respectively, as described in Fig. 1.



**Table S3. The thermostability of CspZ-YA proteins.**

|                                       | CspZ-YA  |          | His-CspZ-YA |          |
|---------------------------------------|----------|----------|-------------|----------|
|                                       | -        | C187S    | -           | I183Y    |
| <b>T<sub>m</sub> (°C)<sup>a</sup></b> | 58.4±0.2 | 62.7±0.1 | 57.5±1.1    | 61.8±0.1 |

<sup>a</sup>Shown is the mean ± standard deviation of the T<sub>m</sub> values derived from six experiments (one replicate per experiment).

<sup>b</sup>Histidine-tagged CspZ-YA

| Strain or plasmid                         | Genotype or characteristic                                                                                                                            | Source        |
|-------------------------------------------|-------------------------------------------------------------------------------------------------------------------------------------------------------|---------------|
| <i>B. burgdorferi</i>                     |                                                                                                                                                       |               |
| B31-A3                                    | Clone A3 of <i>B. burgdorferi</i> B31 isolated from <i>I. scapularis</i> ticks in US.                                                                 | <sup>4</sup>  |
| <i>E. coli</i>                            |                                                                                                                                                       |               |
| BL21(DE3)                                 | F <sup>-</sup> , <i>ompT hsdSB</i> (rB <sup>-</sup> mB <sup>-</sup> ) <i>gal dcm</i> (DE3)                                                            | EMD Millipore |
| BL21(DE3)/pET28a-CspZ                     | BL21(DE3) producing residues 19 to 237 of CspZ from <i>B. burgdorferi</i> B31-A3 (GenBank# AAC65998.1)                                                | <sup>5</sup>  |
| BL21(DE3)/pET28a-CspZ-YA                  | BL21(DE3) producing residues 19 to 237 of CspZ (GenBank# AAC65998.1) with tyrosine-207 and -211 simultaneously replaced by alanine residues (CspZ-YA) | <sup>5</sup>  |
| BL21(DE3)/pET41a-CspZ-YA                  | BL21(DE3) producing residues 19 to 237 of CspZ (GenBank# AAC65998.1) with tyrosine-207 and -211 simultaneously replaced by alanine residues (CspZ-YA) | <sup>6</sup>  |
| BL21(DE3)/pET41a-CspZ-YA <sub>C53S</sub>  | BL21(DE3) producing residues 19 to 237 of CspZ-YA with cysteine-53 replaced by serine                                                                 | This study    |
| BL21(DE3)/pET28a-CspZ-YA <sub>T67P</sub>  | BL21(DE3) producing residues 19 to 237 of CspZ-YA with threonine-67 replaced by proline                                                               | This study    |
| BL21(DE3)/pET28a-CspZ-YA <sub>I80T</sub>  | BL21(DE3) producing residues 19 to 237 of CspZ-YA with isoleucine-80 replaced by threonine                                                            | This study    |
| BL21(DE3)/pET28a-CspZ-YA <sub>F105P</sub> | BL21(DE3) producing residues 19 to 237 of CspZ-YA with phenylalanine-105 replaced by proline                                                          | This study    |
| BL21(DE3)/pET28a-CspZ-YA <sub>I115T</sub> | BL21(DE3) producing residues 19 to 237 of CspZ-YA with isoleucine-115 replaced by threonine                                                           | This study    |
| BL21(DE3)/pET28a-CspZ-YA <sub>K136E</sub> | BL21(DE3) producing residues 19 to 237 of CspZ-YA with lysine-136 replaced by glutamate                                                               | This study    |
| BL21(DE3)/pET28a-CspZ-YA <sub>V142M</sub> | BL21(DE3) producing residues 19 to 237 of CspZ-YA with valine-142 replaced by methionine                                                              | This study    |

|                                           |                                                                                            |            |
|-------------------------------------------|--------------------------------------------------------------------------------------------|------------|
| BL21(DE3)/pET28a-CspZ-YA <sub>I183Y</sub> | BL21(DE3) producing residues 19 to 237 of CspZ-YA with isoleucine-183 replaced by tyrosine | This study |
| BL21(DE3)/pET41a-CspZ-YA <sub>C187S</sub> | BL21(DE3) producing residues 19 to 237 of CspZ-YA with cysteine-187 replaced by tyrosine   | This study |
| BL21(DE3)/pET28a-CspZ-YA <sub>G139M</sub> | BL21(DE3) producing residues 19 to 237 of CspZ-YA with glycine-139 replaced by methionine  | This study |

#### Plasmids

|                                 |                                                                                                                                                                |              |
|---------------------------------|----------------------------------------------------------------------------------------------------------------------------------------------------------------|--------------|
| pET28a-CspZ                     | KanR <sup>a</sup> ; pET28a encoding protein residue 19 to 237 of CspZ from <i>B. burgdorferi</i> B31-A3 (GenBank# AAC65998.1)                                  | <sup>5</sup> |
| pET28a-CspZ-YA                  | KanR; pET28a encoding protein residue 19 to 237 of CspZ (GenBank# AAC65998.1) with tyrosine-207 and -211 simultaneously replaced by alanine residues (CspZ-YA) | <sup>5</sup> |
| pET41a-CspZ-YA                  | KanR; pET41a encoding protein residue 19 to 237 of CspZ (GenBank# AAC65998.1) with tyrosine-207 and -211 simultaneously replaced by alanine residues (CspZ-YA) | <sup>6</sup> |
| pET41a-CspZ-YA <sub>C53S</sub>  | KanR; pET41a encoding protein residue 19 to 237 of CspZ-YA with cysteine-53 replaced by serine                                                                 | This study   |
| pET28a-CspZ-YA <sub>T67P</sub>  | KanR; pET28a encoding protein residue 19 to 237 of CspZ-YA with threonine-67 replaced by proline                                                               | This study   |
| pET28a-CspZ-YA <sub>I80T</sub>  | KanR; pET28a encoding protein residue 19 to 237 of CspZ-YA with isoleucine-80 replaced by threonine                                                            | This study   |
| pET28a-CspZ-YA <sub>F105P</sub> | KanR; pET28a encoding protein residue 19 to 237 of CspZ-YA with phenylalanine-105 replaced by proline                                                          | This study   |
| pET28a-CspZ-YA <sub>I115T</sub> | KanR; pET28a encoding protein residue 19 to 237 of CspZ-YA with isoleucine-115 replaced by threonine                                                           | This study   |
| pET28a-CspZ-YA <sub>K136E</sub> | KanR; pET28a encoding protein residue 19 to 237 of CspZ-YA with lysine-136 replaced by glutamate                                                               | This study   |
| pET28a-CspZ-YA <sub>V142M</sub> | KanR; pET28a encoding protein residue 19 to 237 of CspZ-YA with valine-142 replaced by methionine                                                              | This study   |

|                                 |                                                                                                     |            |
|---------------------------------|-----------------------------------------------------------------------------------------------------|------------|
| pET28a-CspZ-YA <sub>I183Y</sub> | KanR; pET28a encoding protein residue 19 to 237 of CspZ-YA with isoleucine-183 replaced by tyrosine | This study |
| pET41a-CspZ-YA <sub>C187S</sub> | KanR; pET41a encoding protein residue 19 to 237 of CspZ-YA with cysteine-187 replaced by serine     | This study |
| pET28a-CspZ-YA <sub>G139M</sub> | KanR; pET28a encoding protein residue 19 to 237 of CspZ-YA with glycine-139 replaced by methionine  | This study |

---

<sup>a</sup> Kanamycin resistant

239  
240  
  
241  
  
242  
  
243  
  
244  
  
245  
  
246  
  
247  
  
248  
  
249  
  
250  
  
251  
  
252  
  
253  
  
254  
  
255  
  
256  
  
257  
  
258  
  
259  
  
260  
  
261

## Reference

1. Evans P. Scaling and assessment of data quality. *Acta crystallographica Section D, Biological crystallography* **62**, 72-82 (2006).
2. Karplus PA, Diederichs K. Linking crystallographic model and data quality. *Science* **336**, 1030-1033 (2012).
3. Brunger AT. Free R value: a novel statistical quantity for assessing the accuracy of crystal structures. *Nature* **355**, 472-475 (1992).
4. Elias AF, *et al.* Clonal polymorphism of *Borrelia burgdorferi* strain B31 MI: implications for mutagenesis in an infectious strain background. *Infection and immunity* **70**, 2139-2150 (2002).
5. Marcinkiewicz AL, *et al.* Blood treatment of Lyme borreliae demonstrates the mechanism of CspZ-mediated complement evasion to promote systemic infection in vertebrate hosts. *Cellular microbiology* **21**, e12998 (2019).
6. Chen YL, *et al.* Biophysical and biochemical characterization of a recombinant Lyme disease vaccine antigen, CspZ-YA. *International journal of biological macromolecules* **259**, 129295 (2024).
